# Supplementary material for: What Medication-Related Factors Are Important For Polypharmacy And Deprescribing Assessment By Physicians And Pharmacists Using A Novel Website To Rate Clinical Cases?
Source: Research Square preprint supplement (doi:10.21203/rs.3.rs-395434/v1), 2021-07-12
Supplement: Supplementary file 1 [file 63dc3571b8bff82219c89363.docx]

**11. Appendix A. Description of disease and medication-related variables**

| Variable | Description |
| --- | --- |
| Disease-related variable | |
| Comorbidity count | Total numerical count of all comorbid conditions. Intermittent conditions such as infections were excluded unless documented as severe, requiring regular pharmacological management |
| Medication-related variables | |
| *Number-related variable* | |
| Total number of medicines | Total numerical count of all medicines |
| *Medication-combination variables* | |
| Drug-drug interaction | Drug-drug interactions were identified using the Australian Medicines Handbook [22] |
| Drug-disease interaction | Drug-disease interactions were identified using the list of drug-disease or drug-syndrome interactions from Beers Criteria 2015 [24] and a list of treatment conflicts shortlisted after reviewing Australian clinical guidelines on diabetes, heart failure and COPD [22-24] |
| Inappropriate drug class duplication | Inappropriate drug class duplication was identified as described in the Australian Medicines Handbook [22]. |
| *Drug classes individually or grouped* | |
| High-risk medicines | The number of high-risk medicines were identified using the APINCHEN list [20]. |
| Sedative or anticholinergic | Sedatives were identified using the ‘Narcotics and other sedatives’ list from the APINCHEN [20] and anticholinergics were identified using the ‘Drugs with anticholinergic effects’ table from the Australian Medicines Handbook [22]. |
| Anticholinergic | Number in each drug class was included. Drugs were classified into each class as per the categorisation in the Australian Medicines Handbook [22]. |
| Benzodiazepine |
| Opioid |
| Antipsychotic |
| Antidepressant |
| Antiepileptic |
| Antiparkinson |
| NSAID |
| Anticoagulant |
| Antiplatelet |
| Antiarrhythmic |
| Diuretic |
| Antihypertensive |
| Systemic corticosteroid |
| Oral hypoglycaemic |
| Insulin |
| Digoxin |
| Paracetamol (negative control) |
| Vitamin D (negative control) |
| Multivitamin (negative control) |
